# Supplementary material for: Misconduct, Marginality and Editorial Practices in Management, Business and Economics Journals
Source: PLOS journal article supplement (doi:10.1371/journal.pone.0159492), 2016-07-25
Supplement: S5 (10.1371/journal.pone.0159492.s005) [file journal.pone.0159492.s005]

**S4 Table. Journal practices related to reviewers and the review process (absolute numbers and %)**

|                                                                                                 | No Frequency (%) | Yes (%. Frequency) | I don't know (%. Frequency) |
|-------------------------------------------------------------------------------------------------|------------------|--------------------|-----------------------------|
| Do you have any <b>public rewards</b> for good reviewers?                                       | 181 (60.7)       | 113 (37.9)         | 4 (1.3)                     |
| Do you have any policy to <b>add good reviewers</b> to the advisory board after specific years? | 133 (44.6)       | 147 (49.3)         | 18 (6.0)                    |
| Have you tried to implement <b>any crowd-sourcing</b> techniques to engage more reviewers?      | 274 (91.9)       | 17 (5.7)           | 7 (2.3)                     |
| Do you use any <b>review quality instrument</b> to engage authors in evaluating the reviewers?  | 232 (77.9)       | 59 (19.8)          | 7 (2.3)                     |
| Has your journal recently organized <b>debates</b> on a specific theme or finding?              | 148 (49.7)       | 143(48.0)          | 7 (2.3)                     |
| Has your journal published any <b>replication</b> studies in the last two years?                | 216 (72.5)       | 31 (10.4)          | 51 (17.1)                   |

<sup>n</sup>= 298 journals
