# Supplementary material for: Misconduct, Marginality and Editorial Practices in Management, Business and Economics Journals
Source: PLOS journal article supplement (doi:10.1371/journal.pone.0159492), 2016-07-25
Supplement: S6 (10.1371/journal.pone.0159492.s006) [file journal.pone.0159492.s006]

**S5 Table. Cross tabulations of journal features and using software to check submissions for originality**

***A. Cross tabulation of journal main field and using software to check submissions for originality***

| Using software to check submissions for originality |                             | Journal main field    |           |                      | Total |
|-----------------------------------------------------|-----------------------------|-----------------------|-----------|----------------------|-------|
|                                                     |                             | Business & Management | Economics | Cross-Disciplinarity |       |
|                                                     | No                          | 78                    | 56        | 27                   | 161   |
|                                                     | % within Journal main field | 51.7%                 | 65.1%     | 54.0%                | 56.1% |
|                                                     | % of Total                  | 27.2%                 | 19.5%     | 9.4%                 | 56.1% |
|                                                     | Yes                         | 73                    | 30        | 23                   | 126   |
|                                                     | % within Journal main field | 48.3%                 | 34.9%     | 46.0%                | 43.9% |
|                                                     | % of Total                  | 25.4%                 | 10.5%     | 8.0%                 | 43.9% |

N=287; df=2; Pearson  $\chi^2=4.14$ ; Likelihood Ratio  $\chi^2=4.19$ ; Cramer's V=0.12;  
 \*\*\*p<.001; \*\*p<.01; \*p<.05

***B. Cross tabulation of journal indexing status and using software to check submissions for originality***

| Using software to check submissions for originality |                                  | Journal indexing status |       | Total |
|-----------------------------------------------------|----------------------------------|-------------------------|-------|-------|
|                                                     |                                  | Non-ISI                 | ISI   |       |
|                                                     | No                               | 72                      | 89    | 161   |
|                                                     | % within Journal indexing status | 54.5%                   | 57.4% | 56.1% |
|                                                     | % of Total                       | 25.1%                   | 31.0% | 56.1% |
|                                                     | Yes                              | 60                      | 66    | 126   |
|                                                     | % within Journal indexing status | 45.5%                   | 42.6% | 43.9% |
|                                                     | % of Total                       | 20.9%                   | 23.0% | 43.9% |

N=287; df=1; Pearson  $\chi^2=0.24$ ; Likelihood Ratio  $\chi^2=0.24$ ;  $\Phi=-0.03$

\*\*\*p<.001; \*\*p<.01; \*p<.05 [Fisher's Exact Test=0.64]
