# Supplementary material for: Misconduct, Marginality and Editorial Practices in Management, Business and Economics Journals
Source: PLOS journal article supplement (doi:10.1371/journal.pone.0159492), 2016-07-25
Supplement: S11 (10.1371/journal.pone.0159492.s011) [file journal.pone.0159492.s011]

**S10 Table. Cross tabulations of journal features and public rewards for good reviewers**

***A. Cross tabulation of journal main field and public rewards for good reviewers***

| Public rewards for good reviewers |                             | Journal main field    |           |                      | Total |
|-----------------------------------|-----------------------------|-----------------------|-----------|----------------------|-------|
|                                   |                             | Business & Management | Economics | Cross-Disciplinatory |       |
|                                   | No                          | 78                    | 69        | 34                   | 181   |
|                                   | % within Journal main field | 49.4%                 | 81.2%     | 66.7%                | 61.6% |
|                                   | % of Total                  | 26.5%                 | 23.5%     | 11.6%                | 61.6% |
|                                   | Yes                         | 80                    | 16        | 17                   | 113   |
|                                   | % within Journal main field | 50.6%                 | 18.8%     | 33.3%                | 38.4% |
|                                   | % of Total                  | 27.2%                 | 5.4%      | 5.8%                 | 38.4% |

N=294; df=2; Pearson  $\chi^2=24.31^{***}$ ; Likelihood Ratio  $\chi^2=25.54^{***}$ ; Cramer's V=0.29\*\*\*;  
 \*\*\*p<.001; \*\*p<.01; \*p<.05

***B. Cross tabulation of journal indexing status and public rewards for good reviewers***

| Public rewards for good reviewers |                                  | Journal indexing status |       | Total |
|-----------------------------------|----------------------------------|-------------------------|-------|-------|
|                                   |                                  | Non-ISI                 | ISI   |       |
|                                   | No                               | 83                      | 98    | 181   |
|                                   | % within Journal indexing status | 62.4%                   | 60.9% | 61.6% |
|                                   | % of Total                       | 28.2%                   | 33.3% | 61.6% |
|                                   | Yes                              | 50                      | 63    | 113   |
|                                   | % within Journal indexing status | 37.6%                   | 39.1% | 38.4% |
|                                   | % of Total                       | 17.0%                   | 21.4% | 38.4% |

N=294; df=1; Pearson  $\chi^2=0.07$ ; Likelihood Ratio  $\chi^2=0.07$ ;  $\Phi=0.02$   
 \*\*\*p<.001; \*\*p<.01; \*p<.05; [Fisher's Exact Test=0.81]
