# Supplementary material for: Misconduct, Marginality and Editorial Practices in Management, Business and Economics Journals
Source: PLOS journal article supplement (doi:10.1371/journal.pone.0159492), 2016-07-25
Supplement: S12 (10.1371/journal.pone.0159492.s012) [file journal.pone.0159492.s012]

**S11 Table. Cross tabulations of journal features and using review quality instrument to engage authors in evaluating the reviewers**

***A. Cross tabulation of journal main field and using review quality instrument to engage authors in evaluating the reviewers***

| Using review quality instrument to engage authors in evaluating the reviewers |                             | Journal main field    |           |                    | Total |
|-------------------------------------------------------------------------------|-----------------------------|-----------------------|-----------|--------------------|-------|
|                                                                               |                             | Business & Management | Economics | Cross-Disciplinary |       |
|                                                                               | No                          | 119                   | 72        | 41                 | 232   |
|                                                                               | % within Journal main field | 76.3%                 | 84.7%     | 82.0%              | 79.7% |
|                                                                               | % of Total                  | 40.9%                 | 24.7%     | 14.1%              | 79.7% |
|                                                                               | Yes                         | 37                    | 13        | 9                  | 59    |
|                                                                               | % within Journal main field | 23.7%                 | 15.3%     | 18.0%              | 20.3% |
|                                                                               | % of Total                  | 12.7%                 | 4.5%      | 3.1%               | 20.3% |

N=291; df=2; Pearson  $\chi^2=2.61$ ; Likelihood Ratio  $\chi^2=2.66$ ; Cramer's V=0.09;  
 \*\*\*p<.001; \*\*p<.01; \*p<.05

***B. Cross tabulation of journal indexing status and using review quality instrument to engage authors in evaluating the reviewers***

| Using review quality instrument to engage authors in evaluating the reviewers |                                  | Journal indexing status |       | Total |
|-------------------------------------------------------------------------------|----------------------------------|-------------------------|-------|-------|
|                                                                               |                                  | Non-ISI                 | ISI   |       |
|                                                                               | No                               | 107                     | 125   | 232   |
|                                                                               | % within Journal indexing status | 81.7%                   | 78.1% | 79.7% |
|                                                                               | % of Total                       | 36.8%                   | 43.0% | 79.7% |
|                                                                               | Yes                              | 24                      | 35    | 59    |
|                                                                               | % within Journal indexing status | 18.3%                   | 21.9% | 20.3% |
|                                                                               | % of Total                       | 8.2%                    | 12.0% | 20.3% |

N=291; df=1; Pearson  $\chi^2=0.56$ ; Likelihood Ratio  $\chi^2=0.57$ ;  $\Phi=0.04$   
 \*\*\*p<.001; \*\*p<.01; \*p<.05; [Fisher's Exact Test=0.47]
