# Supplementary material for: Misconduct, Marginality and Editorial Practices in Management, Business and Economics Journals
Source: PLOS journal article supplement (doi:10.1371/journal.pone.0159492), 2016-07-25
Supplement: S14 (10.1371/journal.pone.0159492.s014) [file journal.pone.0159492.s014]

**S13 Table. Cross tabulations of journal features and implementing any crowd-sourcing techniques to engage more reviewers**

***A. Cross tabulation of journal main field and implementing any crowd-sourcing techniques to engage more reviewers***

| Implementing any crowd-sourcing techniques to engage more reviewers |                             | Journal main field    |           |                    | Total |
|---------------------------------------------------------------------|-----------------------------|-----------------------|-----------|--------------------|-------|
|                                                                     |                             | Business & Management | Economics | Cross-Disciplinary |       |
|                                                                     | No                          | 142                   | 82        | 50                 | 274   |
|                                                                     | % within Journal main field | 91.6%                 | 96.5%     | 98.0%              | 94.2% |
|                                                                     | % of Total                  | 48.8%                 | 28.2%     | 17.2%              | 94.2% |
|                                                                     | Yes                         | 13                    | 3         | 1                  | 17    |
|                                                                     | % within Journal main field | 8.4%                  | 3.5%      | 2.0%               | 5.8%  |
|                                                                     | % of Total                  | 4.5%                  | 1.0%      | 0.3%               | 5.8%  |

N=291; df=2; Pearson  $\chi^2=4.05$ ; Likelihood Ratio  $\chi^2=4.43$ ; Cramer's V=12;  
 \*\*\*p<.001; \*\*p<.01; \*p<.05

***B. Cross tabulation of journal indexing status and implementing any crowd-sourcing techniques to engage more reviewers***

| Implementing any crowd-sourcing techniques to engage more reviewers |                                  | Journal indexing status |       | Total |
|---------------------------------------------------------------------|----------------------------------|-------------------------|-------|-------|
|                                                                     |                                  | Non-ISI                 | ISI   |       |
|                                                                     | No                               | 128                     | 146   | 274   |
|                                                                     | % within Journal indexing status | 95.5%                   | 93.0% | 94.2% |
|                                                                     | % of Total                       | 44.0%                   | 50.2% | 94.2% |
|                                                                     | Yes                              | 6                       | 11    | 17    |
|                                                                     | % within Journal indexing status | 4.5%                    | 7.0%  | 5.8%  |
|                                                                     | % of Total                       | 2.1%                    | 3.8%  | 5.8%  |

N=291; df=1; Pearson  $\chi^2=0.84$ ; Likelihood Ratio  $\chi^2=0.86$ ;  $\Phi=0.05$   
 \*\*\*p<.001; \*\*p<.01; \*p<.05; [Fisher's Exact Test=0.46]
